# Supplementary material for: Inhibition of synucleinopathic seeding by rationally designed inhibitors
Source: eLife journal article supplement (doi:10.7554/elife.46775), 2020-01-02
Supplement: supp [file elife_poa_e46775_Source_data_1.xlsx]

## Sheet: Sheet1
Raw data for Figure 3C and 3E
	Puncta per well for asyn WT cells
	asyn	asyn + S62				asyn + S61				asyn + S71				asyn + S37				Buffer
		1:1	1:2	1:5	1:10	1:1	1:2	1:5	1:10	1:1	1:2	1:5	1:10	1:1	1:2	1:5	1:10
Replicate 1	19218	8204.49	7505.57	3066.72	2045.78	15884.7	7000.4	4271.35	2866.33	18618.8	15467	6832.38	3053.01	14317.9	15316.7	5925.85	6685.04	448.194
Replicate 2	17008.1	8914.83	7075.3	3102.39	2195.02	16042.1	7937.33	4960.34	2411.01	16576.8	17869	3468.41	4211.69	16613.6	14393.1	5955.26	5368.28	326.571
Replicate 3	20424.7	6307.28	8321.41	2117.44	1526.95	12506.3	6952.49	5318.92	3535.95	17147.1	17795.4	5941.53	5366.97	18229	21658.3	5157.78	5442.69	567.792
	Puncta per well for asyn A53T cells
	asyn	asyn + S62				asyn + S61				asyn + S71				asyn + S37				Buffer
		1:1	1:2	1:5	1:10	1:1	1:2	1:5	1:10	1:1	1:2	1:5	1:10	1:1	1:2	1:5	1:10
Replicate 1	17399.1	6486.05	7937.34	1822.18	690.999	11302.2	7212.01	9086.31	5105.39	16877.7	20712.2	12534.5	6240.02	21182.8	9401.9	5778.44	6723.57	36.9612
Replicate 2	13146.7	4578.06	4914.25	2065.04	293.272	11861.6	11290	9690.72	4628.72	18351.7	16061.7	11012	6224.15	17001.5	4699.2	5365.93	4518.61	46.8465
Replicate 3	14429	6018.57	7349.31	4096.23	812.181	12150.2	10426	6981.41	5343.56	17874	20124.7	9839.58	6349.56	16451.4	8160.68	4506.63	2863.38	60.163
Raw data for Figure 4D										Raw data for Figure S5B
Puncta per well for asyn WT cells										Puncta per well for asyn WT cells
	asyn	S62	S61	S71	S37	Buffer					asyn	asyn+S61 (1:2)	asyn+SP (1:2)	Buffer
Replicate 1	19218	65.9655	101.505	79.7769	167.437	448.194				Replicate 1	19218	7000.4	13585.5	448.194
Replicate 2	17008.1	127.754	106.674	139.488	198.054	326.571				Replicate 2	17008.1	7937.33	19025.8	326.571
Replicate 3	20424.7	182.05	354.115	407.589	334.34	567.792				Replicate 3	20424.7	6952.49	19387.2	567.792
Raw data for Figure 5C and 3E
	Puncta per well for asyn WT cells
	asyn	asyn + S62 (uM)			asyn + S61 (uM)			asyn + S71 (uM)			asyn + S37 (uM)			Buffer
		6.25	12.5	25	6.25	12.5	25	6.25	12.5	25	6.25	12.5	25
Replicate 1	25896.2	10600.6	3779	2122.1	11239.3	4790.28	5245.58	22617	22145.6	20030.1	24689.3	28397.5	23944.3	247.388
Replicate 2	28244.8	9581.49	2734.76	2369.33	9784.4	4401.11	5255.51	26246.5	22043.5	20781.5	26316.6	32669.9	25030.1	233.242
Replicate 3	23986.3	9192.36	4102.33	2788.46	16017.1	5053.51	5703.53	24376.1	22759.6	22094.9	21764.4	27878.7	19824.1	262.29
	Puncta per well for asyn A53T cells
	asyn	asyn + S62 (uM)			asyn + S61 (uM)			asyn + S71 (uM)			asyn + S37 (uM)			Buffer
		6.25	12.5	25	6.25	12.5	25	6.25	12.5	25	6.25	12.5	25
Replicate 1	11466.3	3948.51	783.585	1029.31	4906.36	2212.1	2019.51	13785.2	10379.7	10341.8	8671.14	9279.67	10229.8	11.237
Replicate 2	15241.5	8807.86	2157.22	1714.36	7377.6	2793.48	2717.81	15947.9	12038.9	9476.16	12832.5	12097.3	13214.1	10.7496
Replicate 3	14733.5	6558.54	1107.75	1164.82	5675.39	2597.31	2034.4	18020.1	13893.3	12774.6	10051.9	13935.7	15316.8	16.2871
Raw data for Figure 7D and 7E
	Puncta per well for asyn WT cells
	Replicate1	Replicate2	Replicate3
MSA1	11800.4	10732.1	10836.7
MSA1+S62	2551.56	3326.51	3074.55
MSA1+S61	7734.66	8275.33	7291.78
MSA1+S71	4915.78	4438.59	4017.81
MSA1+S37	4666.21	4614.06	4837.39
MSA2	8268.64	8049.41	9123.05
MSA2+S62	3633.89	2424.9	3204.4
MSA2+S61	6612.76	7074.59	6641.41
MSA2+S71	4185.21	4022.97	3127.29
MSA2+S37	4629.99	4468.48	3937.43
Control	222.855	345.406	237.934
Buffer	342.413	209.898	224.906

## Sheet: ThT raw data 
Time (hrs)	asyn			Buffer+ThT			asyn+S62 (1:1)			asyn+S62 (1:2)			asyn+S62 (1:5)			asyn+S62 (1:10)			asyn+S61 (1:1)			asyn+S61 (1:2)			asyn+S61 (1:5)			asyn+S61 (1:10)			asyn+S71 (1:1)			asyn+S71 (1:2)			asyn+S71 (1:5)			asyn+S71 (1:10)			asyn+S37 (1:1)			asyn+S37 (1:2)			asyn+S37 (1:5)
	Replicate 1	Replicate 2	Replicate 3	Replicate 1	Replicate 2	Replicate 3	Replicate 1	Replicate 2	Replicate 3	Replicate 1	Replicate 2	Replicate 3	Replicate 1	Replicate 2	Replicate 3	Replicate 1	Replicate 2	Replicate 3	Replicate 1	Replicate 2	Replicate 3	Replicate 1	Replicate 2	Replicate 3	Replicate 1	Replicate 2	Replicate 3	Replicate 1	Replicate 2	Replicate 3	Replicate 1	Replicate 2	Replicate 3	Replicate 1	Replicate 2	Replicate 3	Replicate 1	Replicate 2	Replicate 3	Replicate 1	Replicate 2	Replicate 3	Replicate 1	Replicate 2	Replicate 3	Replicate 1	Replicate 2	Replicate 3	Replicate 1
0	15	12	14	15	13	15	13	11	13	15	13	13	14	12	15	16	14	14	12	13	15	10	10	11	15	13	11	12	11	11	12	10	13	14	14	14	10	13	14	12	11	13	11	16	14	12	14	14	10
0.5	13	12	11	16	15	12	11	11	11	13	11	12	15	11	11	13	14	13	12	12	11	12	12	14	12	12	13	15	11	13	14	13	13	12	15	12	12	15	12	16	13	11	15	12	13	10	12	13	12
1	13	13	11	13	17	16	16	13	13	13	13	15	14	12	11	11	13	10	13	11	11	12	12	11	12	14	14	12	13	18	12	11	13	13	12	11	13	13	12	15	15	12	11	10	13	12	11	11	16
1.5	12	13	13	17	14	17	13	14	14	12	11	13	10	11	13	12	16	13	13	12	11	14	15	11	14	16	11	13	15	14	13	12	11	13	13	11	12	17	12	15	13	9	13	13	12	11	11	13	15
2	14	11	12	13	17	15	14	13	14	14	14	11	11	14	12	12	13	11	10	16	13	11	15	12	14	14	12	12	12	14	11	12	14	13	13	15	14	15	16	16	16	16	12	15	11	10	15	13	12
2.5	13	11	18	17	17	15	10	11	15	12	12	12	13	14	14	20	32	23	11	14	17	18	16	13	18	12	16	16	15	12	12	14	16	11	16	11	15	17	13	64	75	65	13	13	15	13	16	17	16
3	15	17	14	16	13	15	12	42	15	17	11	13	31	32	35	41	52	40	17	11	12	30	93	64	73	39	73	51	66	28	15	11	14	17	15	16	22	25	24	220	263	247	14	16	16	14	20	15	17
3.5	14	14	16	18	17	15	18	107	17	70	27	43	66	66	73	68	78	68	73	16	15	149	252	212	205	141	188	133	100	61	15	16	15	26	33	20	103	71	94	437	490	468	15	15	15	15	17	18	20
4	23	19	19	17	17	14	38	170	75	127	85	98	98	98	109	90	98	87	208	17	24	319	422	390	339	280	327	239	183	123	25	24	15	90	106	66	293	231	281	721	752	724	20	16	21	12	14	18	14
4.5	55	44	35	16	16	18	102	228	146	184	139	159	135	136	140	110	111	105	348	21	95	510	596	578	468	411	457	346	279	196	74	59	45	259	278	202	590	459	542	1014	1023	983	58	29	44	16	13	20	14
5	134	117	82	14	18	15	177	276	211	213	193	206	154	151	162	122	130	119	489	99	205	691	755	745	581	541	579	446	370	266	189	151	121	544	595	435	947	670	821	1248	1284	1223	150	73	115	21	19	32	18
5.5	268	265	180	16	19	18	249	309	264	268	238	252	191	197	204	140	134	131	597	224	320	831	870	887	684	645	670	538	446	317	341	299	245	971	995	774	1388	732	792	1300	1496	1432	308	170	263	44	36	64	23
6	460	496	332	16	16	17	294	327	298	285	264	286	209	215	225	150	140	141	671	349	447	908	932	939	743	716	729	594	514	370	601	564	391	1497	1506	1241	1839	1047	1060	1636	1661	1597	535	340	457	97	61	127	35
6.5	708	785	558	15	18	17	329	344	323	312	305	310	236	251	256	158	150	150	657	399	537	1013	1030	957	804	788	771	438	416	410	893	819	537	2151	2166	1826	1770	1073	1303	1850	1869	1788	913	591	766	209	110	213	44
7	1013	1182	829	18	14	17	349	366	343	321	322	322	253	260	262	162	152	155	773	524	654	1052	1048	1073	839	821	816	489	450	457	1352	1248	986	2865	2962	2476	2441	1288	1525	1743	2012	1923	1281	894	1173	356	180	334	60
7.5	1378	1644	1231	16	17	13	370	376	357	330	331	333	267	271	271	167	159	159	870	624	746	1092	1089	1115	868	855	842	541	466	515	1870	1726	1361	3646	3683	3132	3153	1540	1815	2091	2157	2055	1857	1308	1707	553	301	492	82
8	1769	2146	1719	15	18	13	380	381	368	341	336	332	269	275	286	172	164	166	924	693	763	1079	1133	1164	897	881	880	591	492	460	1474	2202	1828	4517	4515	3747	3604	1773	1823	1525	2257	2165	2505	1788	2271	854	467	690	114
8.5	2277	2789	2222	16	14	20	388	391	381	339	343	339	276	280	285	175	169	177	969	774	836	1159	1155	1168	916	902	888	638	510	485	1897	2931	2319	5360	5369	4589	3923	2100	2077	1523	1535	1979	3230	2367	3049	1190	695	970	160
9	2777	3469	2797	16	13	18	397	402	393	341	345	346	279	282	291	181	170	175	1018	830	906	1204	1198	1203	929	923	916	643	487	491	2346	3638	2828	6130	6167	5234	3425	1944	2180	1613	1637	1964	4258	3102	3878	1636	892	1259	217
9.5	3384	4290	3403	13	16	18	405	405	401	344	344	347	279	284	288	186	182	181	1055	885	956	1229	1198	1221	946	942	935	686	518	524	2944	4231	3664	7062	7052	5993	4028	2127	2355	1698	1835	2419	5085	3666	4739	2138	1193	1623	280
10	3965	5023	4028	16	18	17	413	422	414	353	356	356	284	289	291	199	196	192	1117	961	1020	1265	1224	1241	730	846	964	747	542	531	3722	5001	4266	4979	5683	6601	4703	2287	2524	1774	2027	2521	5004	4252	5668	2766	1554	1990	342
10.5	4608	5824	4704	16	18	18	413	418	417	352	351	352	283	289	290	197	192	191	1130	977	1037	1260	1220	1240	806	959	947	784	581	555	4982	5715	4924	5515	6552	7254	5171	2471	2670	1861	2297	2598	6282	4779	6440	3409	2031	2447	411
11	5190	6536	5374	11	14	16	416	427	420	353	351	355	280	288	291	200	191	191	1162	1015	1047	1087	1210	1264	855	981	961	811	613	552	3988	4551	5555	5997	7521	7725	5500	2652	2768	1699	2119	2669	7771	6159	7677	4162	2466	2951	489
11.5	5805	7363	5944	17	14	16	419	425	422	349	351	352	279	283	284	200	192	194	1180	1047	1080	1189	1232	1244	908	977	954	826	621	571	4464	5351	6012	6426	8625	8351	5687	2860	2906	1761	2339	2661	8961	7409	8553	4922	2924	3437	563
12	6395	8063	6537	14	18	12	428	446	441	354	355	359	279	289	290	204	201	201	1229	1109	1140	1242	1243	1281	976	1009	975	838	637	584	4932	5883	6451	6739	9254	8546	5597	2950	3014	1774	2330	2613	9768	7702	8646	5047	3289	4018	646
12.5	6970	8775	7208	17	15	18	427	446	439	357	361	361	287	290	290	208	206	198	1248	1137	1180	1280	1266	1292	1023	1029	992	868	658	601	5252	6750	6951	7829	9879	8952	6012	3153	3067	1803	2453	2803	10583	9173	9962	6178	3758	4472	715
13	7651	9424	7922	15	17	16	426	445	442	359	360	368	282	294	292	201	201	204	1271	1175	1210	1309	1295	1305	1013	1010	873	729	670	636	5866	6858	7335	9853	10179	6173	3910	3093	3227	1859	2366	2773	11275	9698	10267	5873	4203	4986	773
13.5	8178	9909	8300	16	16	17	423	443	442	349	359	353	277	286	285	200	199	194	1263	1170	1195	1281	1259	1272	1002	990	919	769	679	656	6783	8595	7693	10705	10406	6639	4077	3157	3295	1906	2786	2825	11797	10157	11255	7018	4585	5500	874
14	8420	10033	8515	19	14	16	432	453	455	362	362	363	283	291	294	207	206	201	1312	1208	1242	1307	1287	1307	1043	1029	951	789	681	663	7097	8754	7931	10939	10239	6884	4100	3256	3385	1942	2736	2737	11598	9802	10185	6756	4709	5783	919
14.5	9271	10758	9333	15	15	19	422	440	446	355	360	352	277	286	284	205	200	200	1296	1224	1250	1287	1270	1293	1013	1009	983	822	689	675	8007	9695	8297	11006	10665	7590	4305	3440	3555	1995	2953	2890	12568	11217	12010	8327	5174	6190	994
15	9788	11167	9771	16	17	16	438	469	466	362	365	365	283	287	292	208	202	180	1331	1266	1274	1319	1304	1307	1056	994	857	848	725	702	8720	9957	8606	11143	10814	7823	4537	3724	3742	2067	3007	2935	13056	11517	12462	9377	5539	6636	1054
15.5	10064	11341	10073	16	18	17	427	453	451	354	357	358	277	285	286	205	198	200	1316	1248	1274	1304	1285	1303	1026	1019	1012	874	738	721	9701	10074	8729	11204	10819	9044	5220	4069	4017	2217	3030	2950	13217	11798	12533	9592	5769	6984	1145
16	10522	11650	10406	15	15	17	426	454	454	355	361	366	283	291	292	206	201	199	1347	1283	1081	927	1239	1341	1023	1024	1011	897	764	587	6762	8951	9142	11328	10823	9562	5687	4212	3999	2105	3025	2994	13422	12067	12802	9900	6028	7241	1181
16.5	10728	11681	10559	16	19	17	429	463	464	364	365	361	284	290	286	207	206	204	1356	1298	1142	977	1309	1331	1041	1054	1034	902	762	597	6906	9388	8983	11304	10935	9787	6210	4307	4061	2125	3090	2996	13382	12038	12949	9893	6094	7340	1203
17	11041	11959	10863	19	18	17	434	467	465	358	366	364	281	288	287	205	204	205	1380	1315	1215	1101	1321	1334	1049	1053	1042	927	807	629	7180	10342	9299	11364	10898	10239	6947	4516	4178	2182	3112	3009	9841	10100	13188	9997	6035	7298	1249
17.5	11295	12150	11088	17	17	16	436	470	467	362	363	360	281	290	289	204	203	206	1386	1316	1314	1218	1321	1330	1045	1048	1046	916	833	673	7374	10587	9277	11450	11109	10301	7063	4751	4502	2344	3109	3032	9854	10825	13238	10104	6146	7431	1332
18	11472	12247	11236	17	15	17	434	479	474	367	364	365	281	289	285	208	204	210	1398	1334	1340	1301	1337	1340	1065	1057	1064	940	850	709	7583	10806	9534	11303	11060	10459	7058	4771	4711	2678	3123	3031	8624	11721	13438	9383	5844	7652	1425
18.5	11527	12299	11213	15	17	17	433	479	471	363	367	366	284	289	291	208	207	204	1406	1324	1356	1318	1326	1360	1066	1065	1045	927	846	710	8092	10753	9504	11437	11029	10488	7121	4905	4858	2900	3113	3037	8768	12212	13409	10264	6171	7745	1433
19	11820	12330	11438	17	13	17	432	480	472	355	361	366	284	286	291	207	202	205	1403	1335	1369	1343	1339	1345	1053	1055	1038	918	860	724	9036	10862	9620	11435	11096	10434	7151	5133	4994	2510	2053	2960	9444	12640	13417	10437	6452	8051	1246
19.5	11980	12443	11407	13	20	15	435	480	469	358	364	361	280	285	289	204	198	198	1403	1315	1360	1332	1328	1338	1047	1058	1026	892	852	745	9939	10789	9638	11532	11059	10448	7227	5332	5152	2613	2093	3019	10058	12778	13541	10377	6617	8248	1314
20	12147	12514	11526	17	20	16	430	476	470	354	358	359	276	281	285	204	203	204	1386	1308	1350	1311	1310	1327	1050	1056	1032	922	868	754	10643	10908	9758	11560	11112	10532	7208	5421	5264	2640	2178	2992	10609	12747	13557	10459	6615	8337	1347
20.5	12240	12602	11634	14	16	17	432	481	480	358	367	362	279	284	285	206	204	204	1413	1330	1396	1337	1337	1351	1062	1052	1035	921	863	766	10831	10922	9694	11496	11145	10527	7225	5518	5419	2720	2279	3006	10871	12790	13488	10413	6731	8514	1379
21	12257	12680	11724	13	16	17	436	492	479	357	367	366	280	287	291	208	203	203	1434	1342	1404	1357	1343	1379	1074	1060	1058	927	877	784	11182	11016	9819	11679	11175	10556	7232	4982	4778	2738	2523	3062	11455	12930	13590	10279	4750	6889	1305
21.5	12318	12773	11878	16	16	17	438	503	493	368	370	383	286	292	293	205	206	204	1450	1362	1453	1400	1388	1393	1089	1025	745	741	891	820	11195	9915	10061	11711	10426	6655	4851	5052	5170	2793	2457	3075	11776	12971	12273	9987	4854	7021	1327
22	12332	12698	11748	15	16	16	452	524	512	381	379	375	287	288	292	213	213	198	1362	1384	1458	1385	1382	1379	1112	1108	760	740	928	849	11561	11101	10099	11846	11217	6751	5089	5493	5512	2897	2691	3095	12122	13036	13442	10595	5038	7161	1393
22.5	12476	12738	11793	17	17	16	441	511	497	370	373	372	284	289	287	206	203	207	1480	1366	1457	1362	1380	1369	1096	1100	829	832	895	853	11740	11076	9926	11756	11310	6971	5451	5700	5782	2979	2903	3077	12915	13151	13744	10627	5310	7211	1439
23	12596	12784	11882	16	14	12	439	512	499	372	370	369	284	289	289	212	206	208	1473	1353	1440	1399	1389	1417	1100	1108	874	747	684	847	11752	11208	9278	11874	11302	7158	4593	3841	5168	3048	3081	3122	13238	13091	13906	10669	5074	7235	1457
23.5	12596	12807	11890	17	15	18	458	523	502	371	374	374	285	291	291	218	209	212	1486	1358	1462	1387	1380	1407	1142	1120	903	784	698	854	11898	11086	10145	11903	11363	7425	4660	3872	5303	3057	3075	3103	13752	13253	13765	10111	5045	7251	1444
24	12502	13010	11889	16	19	18	440	515	500	363	367	372	279	284	288	205	199	205	1486	1351	1458	1387	1364	1392	1101	1098	958	839	745	874	12101	11146	10143	11816	11385	8473	4775	3961	5797	3104	3181	3072	14102	13277	13993	10732	5256	7554	1507
24.5	12550	12995	11948	19	19	17	440	516	501	366	366	370	277	280	283	205	199	204	1482	1343	1461	1357	1367	1387	1103	1102	993	860	787	869	12161	11121	10112	11861	11389	9057	4844	4059	5952	3085	3133	2996	14269	13123	13999	10698	5480	7911	1542
25	12626	12964	12003	16	18	16	440	518	499	361	367	368	274	283	284	208	200	201	1491	1347	1474	1370	1375	1380	1109	1098	1046	878	813	880	12363	11326	10269	11877	11387	9562	4948	4104	6058	3109	3147	3044	14233	13231	13959	10753	5784	8457	1577
25.5	12767	13135	11983	17	17	17	446	530	511	371	370	376	282	290	287	207	203	205	1521	1360	1514	1396	1411	1422	1134	1112	998	870	855	918	12372	10693	10335	11845	9858	6600	4395	4154	6149	2992	2806	2997	14457	11894	8527	8214	5829	8701	1561
26	12757	13259	11969	14	15	16	445	537	518	379	377	383	284	287	289	206	202	205	1529	1390	1518	1428	1404	1419	1139	1116	1018	907	904	938	12437	11170	10428	11727	8231	6187	4426	4503	6243	2870	3022	3067	14214	8370	7862	8656	6296	8850	1519
26.5	12788	13246	12102	16	19	14	444	536	513	370	374	378	276	291	287	206	199	205	1524	1358	1530	1404	1410	1426	1133	1131	1055	921	906	920	11980	8099	9681	11976	8925	6285	4536	5126	6331	2656	2174	2408	14441	8586	7957	9058	6705	9059	1583
27	12871	13435	12134	16	17	17	452	547	525	369	372	382	283	288	287	212	206	209	1562	1371	1538	1408	1419	1415	1141	1161	1107	955	907	949	12289	8638	10471	7831	8572	6398	4540	4678	6002	2727	2224	2560	9277	8392	8047	8754	6183	8815	1629
27.5	12955	13358	12128	14	16	15	448	550	523	377	372	378	281	288	289	207	201	209	1546	1367	1545	1407	1437	1450	1138	1138	1104	928	820	898	12457	9535	10557	8111	9128	6572	4501	3730	4694	2792	2261	2455	9483	8655	8258	9312	5646	8293	1677
28	12887	13477	12166	15	17	16	457	556	530	379	384	389	287	289	290	196	166	199	1578	1398	1525	1422	1457	1452	878	731	888	958	872	866	11594	10074	10628	7831	7534	6525	4632	3823	4734	2841	2336	2761	9591	8712	8302	9788	5976	8507	1712
28.5	13012	13540	12259	14	15	17	458	557	522	367	376	372	273	285	287	205	183	205	1543	1351	1521	1396	1402	1426	929	735	962	943	872	916	12596	11005	10645	8052	7615	6661	4850	3883	4874	3042	2583	3040	9816	8883	8379	10566	6401	8723	1753
29	13034	13631	12176	21	16	16	456	567	535	374	374	375	282	286	288	212	189	209	1572	1373	1597	1429	1440	1453	992	745	943	936	917	955	12512	10911	10640	8201	7247	6021	4629	3995	4912	2786	2510	3098	9872	8504	7756	9195	6743	9142	1696
29.5	13016	13622	12342	12	18	14	456	565	538	373	379	371	281	288	284	210	196	206	1560	1349	1578	1419	1436	1418	1023	753	1045	946	911	930	12542	9185	6787	8689	7365	6127	4720	4247	5117	3028	2329	1977	10109	8845	7820	9753	6971	9402	1778
30	13067	13595	12259	16	17	18	458	578	538	375	375	375	277	289	284	209	204	211	1599	1360	1600	1426	1424	1437	1090	788	1120	949	913	937	12834	9530	6926	9159	7535	6169	4858	4478	5493	3102	2359	2036	10319	9340	7747	8825	6942	9550	1786
30.5	13156	13703	12315	17	18	18	459	583	544	378	374	381	285	290	284	213	207	208	1582	1365	1622	1421	1444	1447	1148	863	1157	949	920	948	12809	9834	7127	9821	7811	6304	5275	4915	6031	3154	2454	2074	10218	8798	7850	9712	6962	9347	1791
31	13239	13781	12346	15	18	15	460	591	545	377	384	392	291	293	291	213	195	152	1214	1374	1639	1448	1236	1470	1193	885	748	668	926	963	12841	9260	7201	10239	8169	6246	5271	5132	6449	3197	2609	2261	11073	9158	7889	10792	7238	9697	1793
31.5	13370	13863	12432	17	18	18	463	604	555	387	385	386	287	288	289	206	198	161	1419	1405	1669	1461	1468	1472	780	744	752	690	919	911	12871	10215	7721	7457	7182	6348	5483	5235	6453	3251	2992	2472	11110	9222	7989	11092	7414	9817	1823
32	13463	13847	12380	16	20	18	468	602	554	378	377	379	280	289	289	211	206	175	1591	1371	1638	1441	1444	1471	817	768	772	711	920	936	12837	10920	8701	7560	7179	6351	5966	5619	6590	3207	3189	2681	11618	8920	7929	11234	7544	9982	1818
32.5	13546	14020	12472	17	16	17	471	610	558	382	389	393	289	292	293	215	176	149	1620	1378	1682	1352	1442	1479	879	703	687	719	942	972	12232	10700	10397	7876	7201	6333	6360	5848	6719	3226	3288	3009	12299	9466	8070	11297	7670	10164	1825
33	13661	13960	12510	18	20	16	461	606	553	380	371	381	276	285	285	210	182	162	1596	1351	1643	1414	1427	1452	923	696	676	806	929	940	12935	11547	11289	8183	7244	6428	7137	5983	6722	3157	3215	3085	12603	9662	8137	11179	7669	10267	1815
33.5	13519	13974	12429	17	19	18	463	616	554	372	371	374	277	284	285	208	193	168	1609	1352	1670	1428	1453	1470	969	707	690	801	901	929	13091	11783	11379	8788	7384	6456	7194	6057	6785	3166	3104	2851	13146	10320	8287	11218	7739	10521	1816
34	13605	13987	12505	16	15	16	462	615	563	374	376	382	282	280	283	210	197	171	1612	1361	1682	1399	929	985	992	716	696	829	918	939	12804	7564	7785	9077	7420	6514	7385	6092	6842	3151	3145	2787	13419	10559	8261	11247	7763	10654	1816
34.5	13597	14029	12501	15	17	17	468	622	570	373	374	378	280	284	286	212	199	176	1640	1365	1686	1446	985	1043	1021	733	710	893	914	922	12643	7644	8089	9552	7530	6539	7586	5734	4507	2395	3174	2997	14089	10850	8417	11262	7514	7701	1391
35	13624	14065	12561	16	16	16	485	651	579	387	384	389	281	287	289	198	197	190	1670	1373	1719	1451	1034	1109	997	754	740	936	942	945	12798	7691	8175	9864	7617	6661	7693	5797	4523	2410	3132	2984	14435	11107	8508	11313	7492	7654	1348
35.5	13662	14135	12549	16	18	15	471	643	572	381	383	387	278	288	286	213	207	195	1679	1362	1732	1472	1117	1258	1116	758	734	970	927	959	12947	7963	8679	10656	8193	6753	7769	6075	4862	2641	3249	3113	14751	10844	7885	10797	7784	7776	1314
36	13697	14099	12501	17	16	19	468	636	576	380	380	388	282	291	292	214	208	199	1670	1361	1518	1184	1145	1430	1170	782	749	958	928	671	8717	7768	9386	11052	8577	7038	7887	6102	4828	2426	3229	3101	14943	11115	8007	11296	7866	7958	1335
36.5	13747	14247	12569	17	16	20	481	664	586	384	382	388	281	289	290	194	213	209	1700	1368	1556	1267	1186	1479	1147	811	791	970	932	678	8820	7922	9846	11954	9262	7331	7944	6153	4885	2412	3219	3085	15063	11559	8159	11276	7683	7981	1316
37	13752	14221	12526	13	17	14	468	654	576	377	372	385	280	285	280	209	207	210	1674	1345	1707	1385	1233	1475	1214	838	853	964	913	705	8999	8203	11529	12421	9802	7917	7913	6173	5196	2553	3197	3072	15141	12060	8424	11417	7919	8515	1371
37.5	13792	14210	12610	16	18	14	475	662	572	379	375	387	277	287	282	210	205	201	1692	1349	1761	1436	1304	1477	1213	869	910	963	925	738	9053	8522	11869	12423	10062	8236	7941	6213	5271	2551	3235	3107	15134	12300	8645	11379	7719	7622	1171
38	13840	14240	12645	18	17	19	477	674	577	379	373	383	277	286	285	207	208	206	1686	1357	1794	1468	1380	1499	1212	901	959	958	921	764	9334	9319	11824	12372	10327	8518	7937	6239	5510	2709	3203	3074	15168	12564	8881	11427	7896	7967	1189
38.5	13751	14301	12568	17	16	17	467	682	580	377	373	382	273	286	284	212	206	207	1691	1358	1813	1452	1440	1490	1223	919	1013	949	911	802	9970	10239	11933	12337	10535	8844	7897	6247	5651	2887	3208	3073	15241	12731	9081	11407	7899	8317	1205
39	13818	14313	12671	19	16	13	484	699	592	384	379	389	282	285	290	219	213	207	1742	1368	1843	1485	1479	1511	1274	949	1097	978	924	832	10424	10489	11916	11217	9625	9086	8020	6303	5727	2922	3230	3044	14617	11871	9176	11470	7932	8441	1196
39.5	13768	14277	12665	16	17	19	475	696	599	380	376	385	280	282	282	208	205	210	1727	1352	1856	1476	1483	1476	1225	972	1159	960	913	858	12055	11540	12057	12422	10688	9777	7988	6301	5945	3108	3212	3083	15132	13315	9705	11379	7938	8833	1265
40
40.5
41
41.5
42
42.5
43
43.5
44
44.5
45
45.5
46
46.5
47
47.5
48
48.5
49
49.5
50
50.5
51
51.5
52
52.5
53
53.5
54
54.5
55
55.5
56
56.5
57
57.5
58
58.5
59
59.5
60
60.5
61
61.5
62
62.5
63
63.5
64
64.5
65
65.5
66
66.5
67
67.5
68
68.5
69
69.5
70
70.5
71
71.5
72
72.5
73
73.5
74
74.5
75
75.5
76
76.5
77
77.5
78
78.5
79
79.5
80
80.5
81
81.5
82
82.5
83
83.5
84
84.5
85
85.5
86
86.5
87
87.5
88
88.5
89
89.5
90
90.5
91
91.5
92
92.5
93
93.5
94
94.5
95
95.5
96
96.5
97
97.5
98
98.5
99
99.5
100
100.5
101
101.5
102
102.5
103
103.5
104
104.5
105
105.5
106
106.5
107
107.5
108
108.5
109
109.5
110
110.5
111
111.5
112
112.5
113
113.5
114
114.5
115
115.5
116
116.5
117
117.5
118
118.5
119
119.5
120
120.5
121
121.5
122
122.5
123
123.5
124
124.5
125
125.5
126
126.5
127
127.5
128
128.5
129
129.5
130
130.5
131
131.5
132
132.5
133
133.5
134
134.5
135
135.5
136
136.5
137
137.5
138
138.5
139
139.5
140
140.5
141
141.5
142
142.5
143
143.5
144
144.5
145
145.5
146
146.5
147
147.5
148
148.5
149
149.5
150
150.5
151
151.5
152
152.5
153
153.5
154
154.5
155
155.5
156
156.5
157
157.5
158
158.5
159
159.5
160
160.5
161
161.5
162
162.5
163
163.5
164
164.5
165
165.5
166
166.5
167
167.5
168
168.5
169
169.5
170
170.5
171
171.5
172
172.5
173
173.5
174
174.5
175
175.5
176
176.5
177
177.5
178
178.5
179
179.5
180
180.5
181
181.5
182
182.5
183
183.5
184
184.5
185
185.5
186
186.5
187
187.5
188
188.5
189
189.5
190
190.5
191
191.5
192
192.5
193
193.5
194
194.5
195
195.5
196
196.5
197
197.5
198
198.5
199
199.5
200
200.5
201
201.5
202
202.5
203
203.5
204
204.5
205
205.5
206
206.5
207
207.5
208
208.5
209
209.5
210
210.5
211
211.5
212
212.5
213
213.5
214
214.5
215
215.5
216
216.5
217
217.5
218
218.5
219
219.5
220
220.5
221
221.5
222
222.5
223
223.5
224
224.5
225
225.5
226
226.5
227
227.5
228
228.5
229
229.5
230
230.5
231
231.5
232
232.5
233
233.5
234
234.5
235
235.5
236
236.5
237
237.5
238
238.5
239
239.5
240
240.5
241
241.5
242
242.5
243
243.5
244
244.5
245
245.5
246
246.5
247
247.5
248
248.5
249
249.5
250
250.5
251
251.5
252
252.5
253
253.5
254
254.5
255
255.5
256
256.5
257
257.5
258
258.5
259
259.5
260
260.5
261
261.5
262
262.5
263
263.5
264
264.5
265
265.5
266
266.5
267
267.5
268
268.5
269
269.5
270
270.5
271
271.5
272
272.5
273
273.5
274
274.5
275
275.5
276
276.5
277
277.5
[truncated: 39 more columns]
